# Supplementary material
Source: Springer Nature journal article supplement (https://www.springermedizin.de/resource/supplementary/12958_2012_1032_MOESM1_ESM.pdf/9566630)

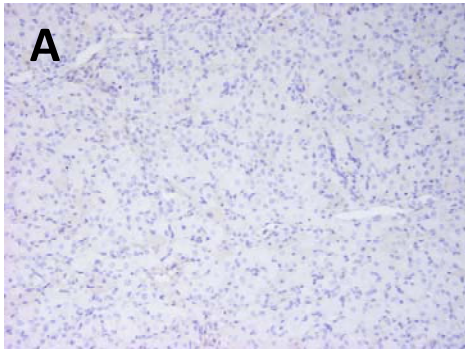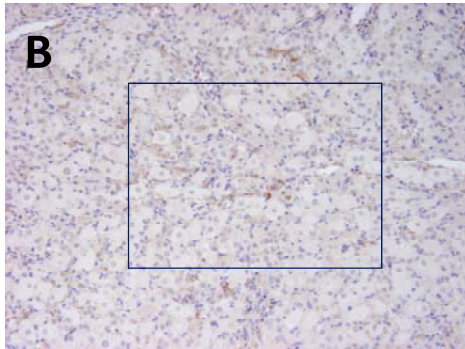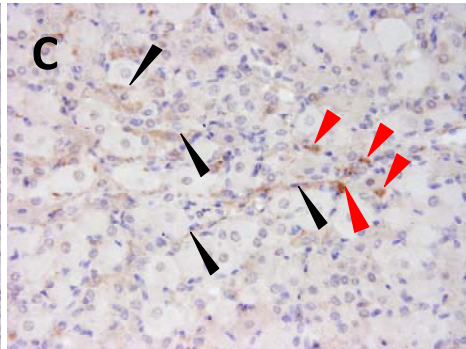

Supplement: MOESM1 [file 9566630]
